# Supplementary material for: Batch and Continuous Column Adsorption of p-Nitrophenol onto Activated Carbons with Different Particle Sizes
Source: MDPI journal article supplement (doi:10.3390/pr11072045), 2023-07-08
Supplement: s1 [file s1]

### Supplementary information

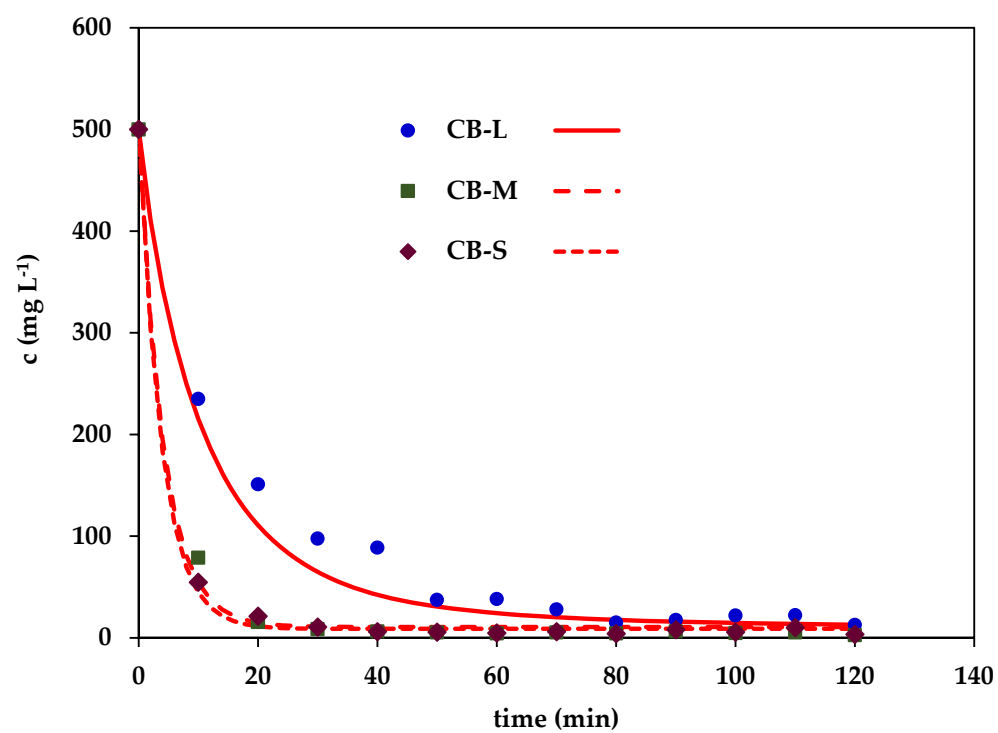

**Figure S1.** Experimental and 2D-Batch model kinetic values of PNP concentration in the solutions,  $c$ .

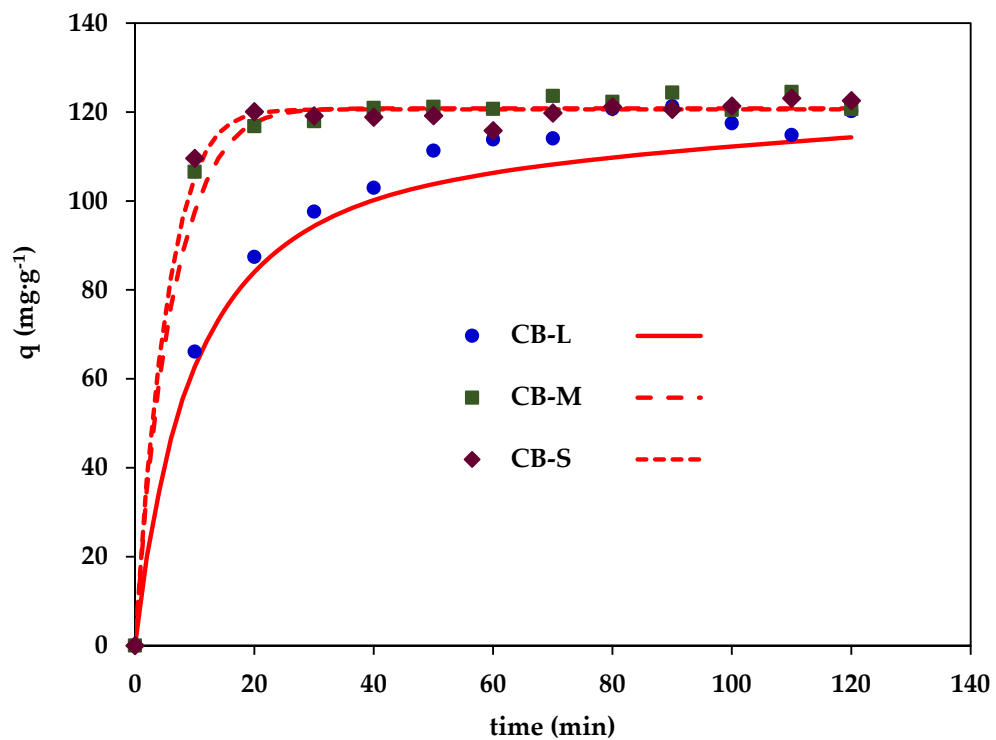

**Figure S2.** Experimental and 2D-Batch model kinetic values of PNP concentration in the carbons,  $q$ .

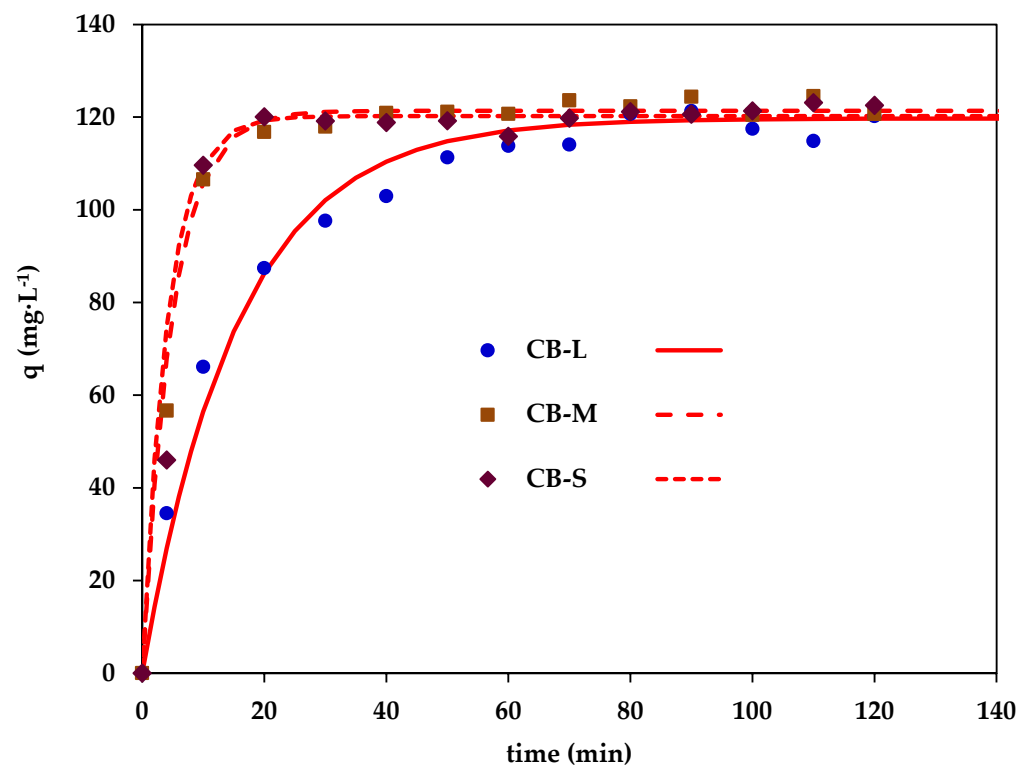

**Figure S3.** Experimental and PFO model kinetic values of PNP concentration in the carbons,  $q$ .

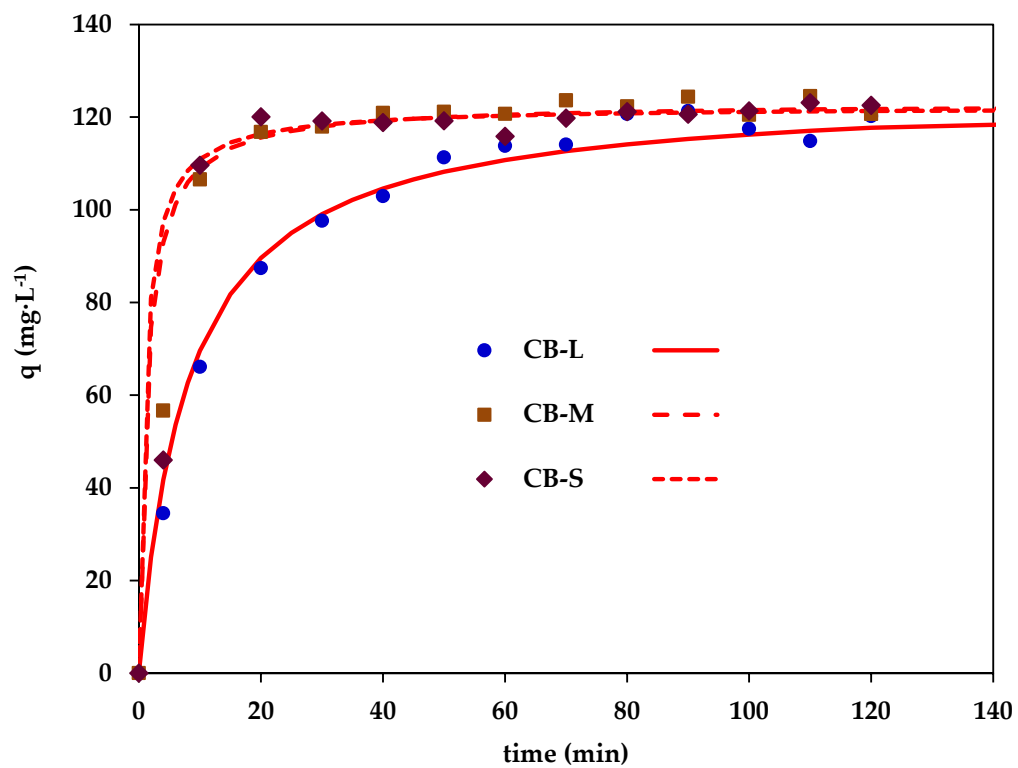

**Figure S4.** Experimental and PSO model kinetic values of PNP concentration in the carbons,  $q$ .

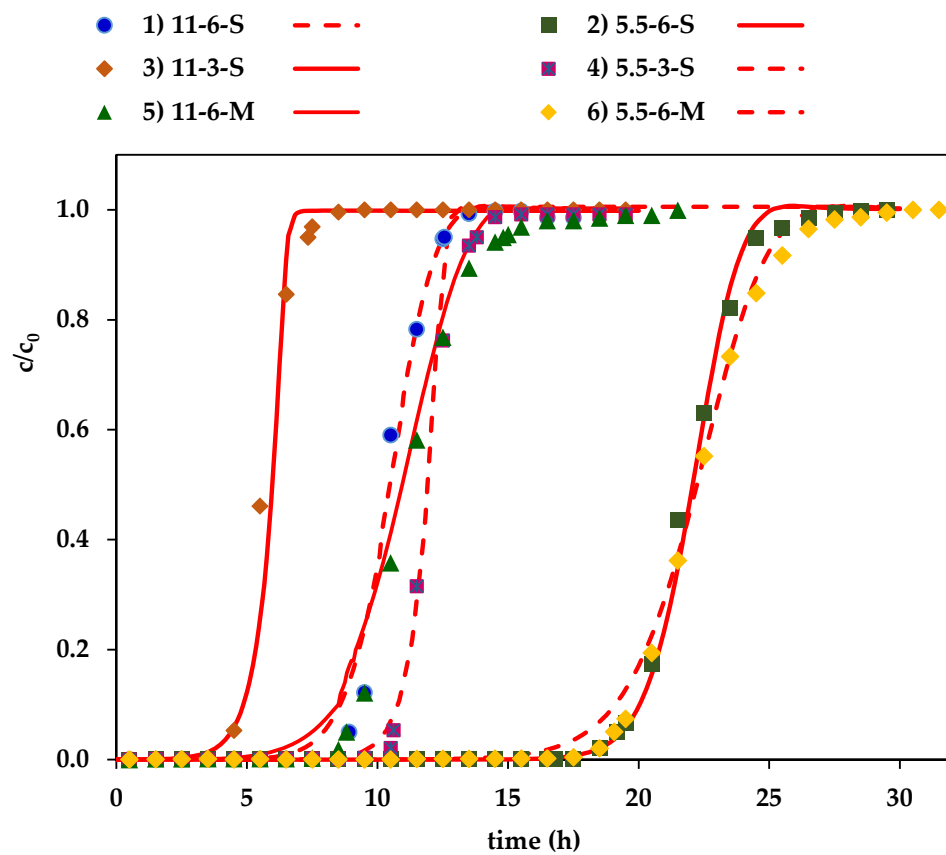

**Figure S5.** 2D-column breakthrough curves for the six experiments.

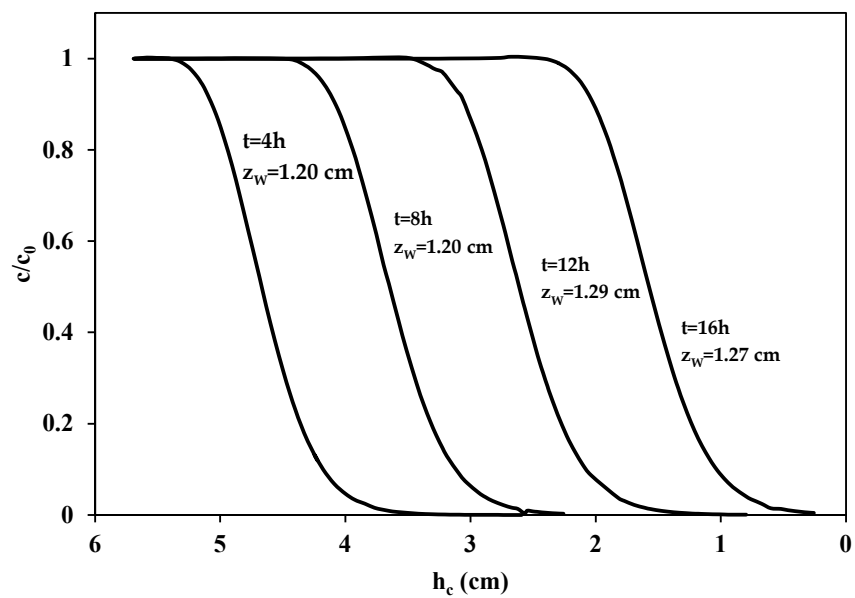

**Figure S6.** PNP concentration wave at 4h, 8h, 12h, and 16h for the run 2) 5.5-6-S.

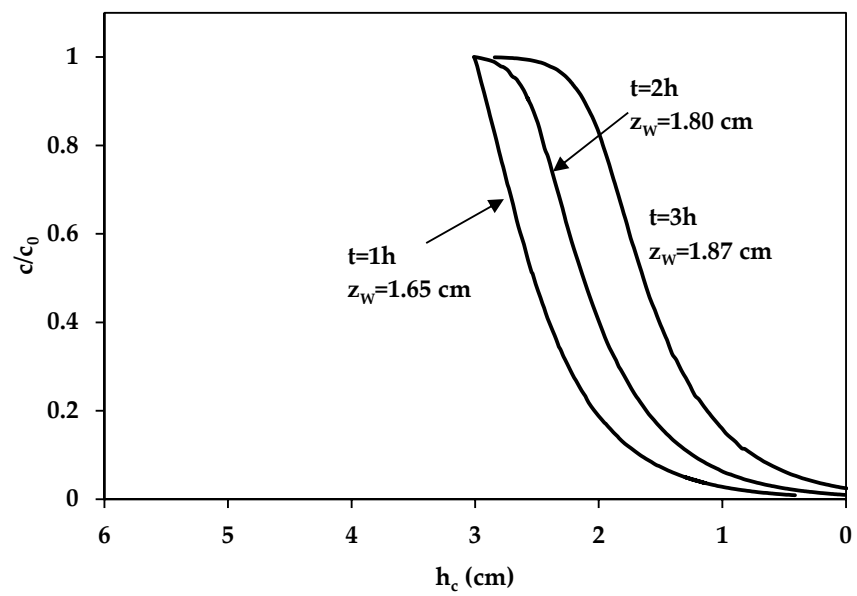

**Figure S7.** PNP concentration wave at 1h, 2h, and 3h, for the run 3) 11-3-S.

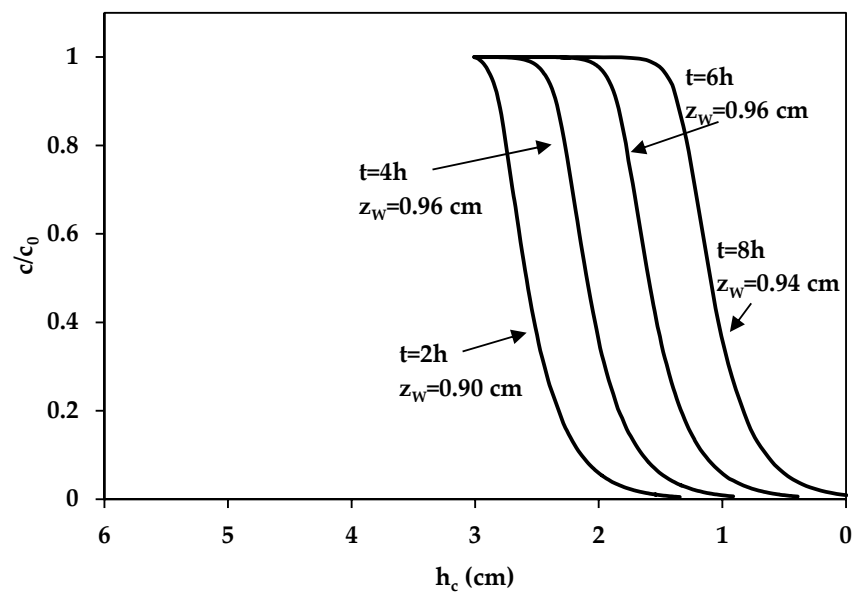

**Figure S8.** PNP concentration wave at 2h, 4h, 6h, and 8h, for the run 4) 5.5-3-S.

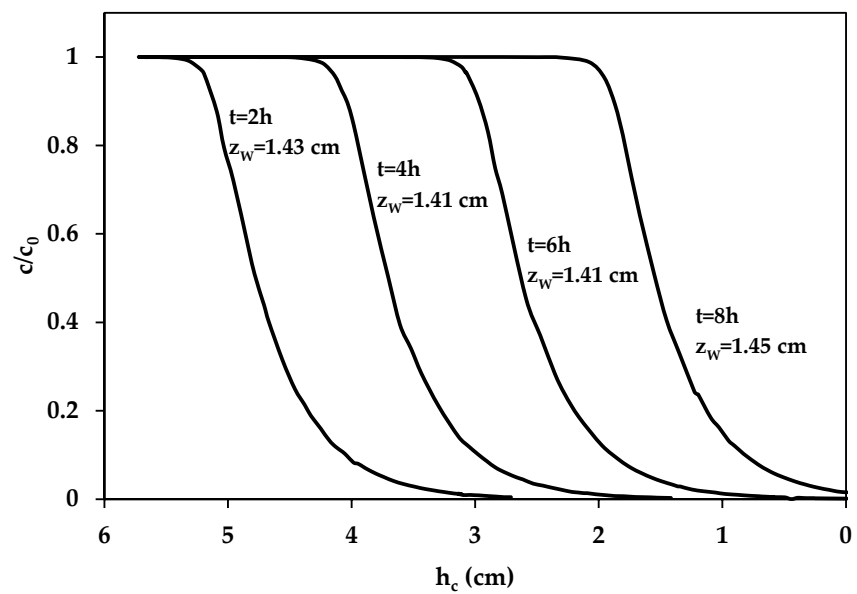

**Figure S9.** PNP concentration wave at 2h, 4h, 6h, and 8h, for the run 5) 11-6-M.

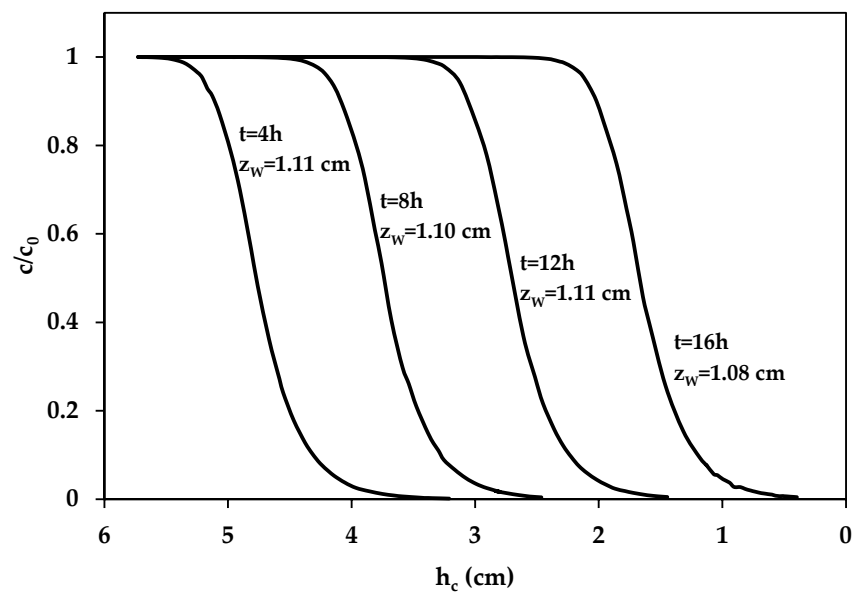

**Figure S10.** PNP concentration wave at 4h, 8h, 12h and 16h, for the run 6) 5.5-6-M.
